# Supplementary material
Source: PubMed Central journal article supplement (PMC2695802)

**Supplemental movie 1. Normal Keratinocytes display polarized migration.**

Phase contrast movie of an individual HEK plated for 16 h onto an uncoated glass bottomed dish and imaged every 2 min over 2 h using a 20x objective. Frame rate 10fps, 2 min per frame.

**Supplemental movie 2. Keratinocytes deficient in BPAG1e display aberrant**

**motile behavior.** Phase contrast movie of an individual HEKCn2 plated for 16 h onto an uncoated glass bottomed dish and imaged every 2 min over 2 h using a 20x objective. Frame rate 10fps, 2 min per frame.

**Supplemental Figure 1**

HEKCn2s were plated overnight onto glass bottomed dishes. Phase contrast images of live cells were acquired 24h after plating. Sheet like extensions beyond the cell body were scored as lamellipodia. Representative examples of HEKCn2s displaying 0, 1, 2, or 3+ such extensions are shown with arrows indicating location of lamellipodia.

A

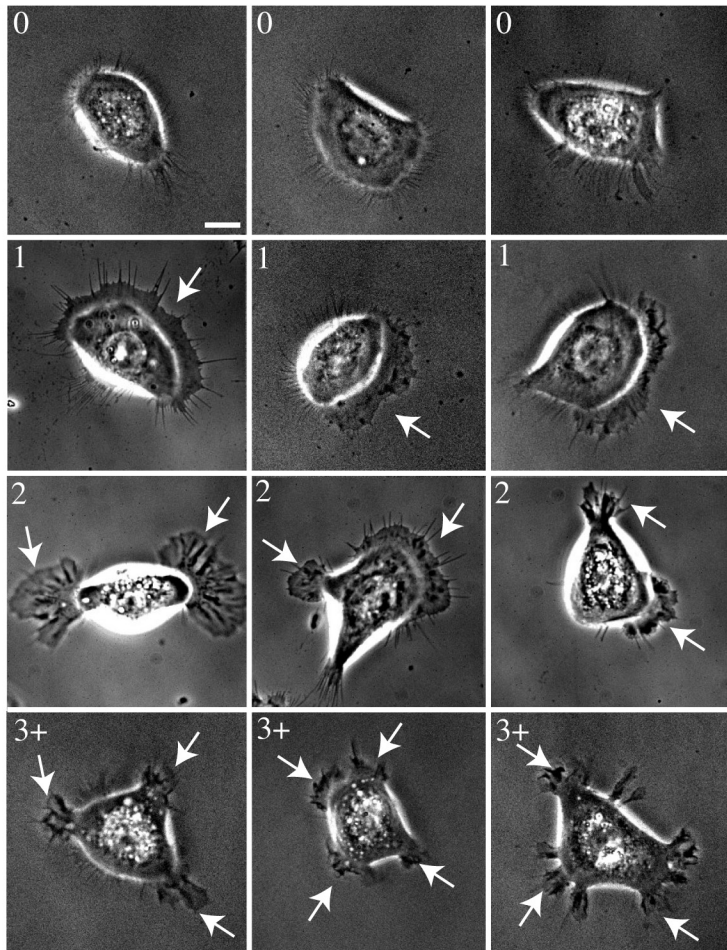

Supplement: E09-01-0051_1.pdf [file E09-01-0051_1.pdf]
